# Supplementary material
Source: Springer Nature journal article supplement (https://www.springermedizin.de/resource/supplementary/12957_2011_937_MOESM4_ESM.pdf/9562112)

G→T(287)

A G G A A G A N A A T C T C C G C A A G A A A

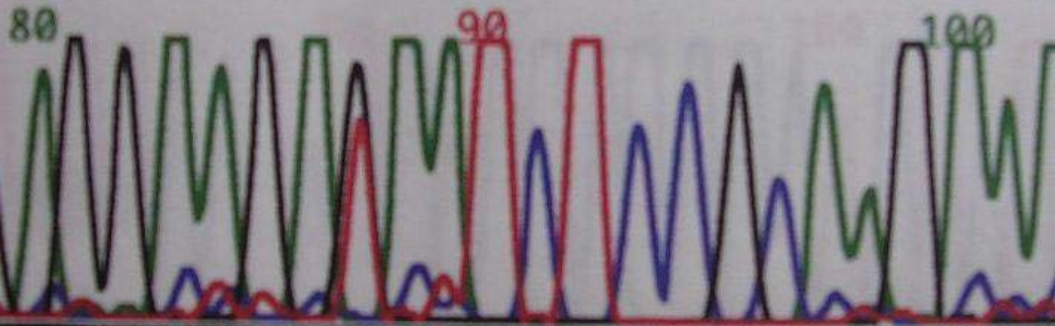

Supplement: MOESM4 [file 9562112]
